# Supplementary material
Source: publisher figshare collection journal article supplement (https://acs.figshare.com/ndownloader/files/5118424)
Supplement: Supplementary file 1 [file 5118424]

## **Lists of Supporting Information Available**

### **"New Hectochlorin and Morpholine Derivatives from the Thai Sea Hare, *Bursatella leachii*"**

- S1. The photo of the Thai sea hare, *Bursatella leachii*
- S2. 300 MHz  $^1\text{H}$  NMR spectrum in  $\text{CDCl}_3$  of hectochlorin (**1**)
- S3. 300 MHz  $^1\text{H}$  NMR spectrum in  $\text{CDCl}_3$  of deacetylhectochlorin (**2**)
- S4. 75 MHz (a) DEPT-135 and (b)  $^{13}\text{C}$  NMR spectra in  $\text{CDCl}_3$  of deacetylhectochlorin (**2**)
- S5. HMQC spectrum in  $\text{CDCl}_3$  of deacetylhectochlorin (**2**)
- S6. H, H-COSY spectrum in  $\text{CDCl}_3$  of deacetylhectochlorin (**2**)
- S7. HMBC ( $^nJ_{\text{HC}} = 8 \text{ Hz}$ ) spectrum in  $\text{CDCl}_3$  of deacetylhectochlorin (**2**)
- S8. The accurate mass from the HREIMS spectrum of deacetylhectochlorin (**2**)
- S9. 300 MHz  $^1\text{H}$  NMR spectra in  $\text{CDCl}_3$  of (a) natural and (b) transformed deacetylhectochlorin (**2**)
- S10. CD spectra (in MeOH) of (a) natural and (b) transformed deacetylhectochlorin (**2**)
- S11. 600 MHz  $^1\text{H}$  NMR spectrum in  $\text{CDCl}_3$  of **3**
- S12. 150 MHz  $^{13}\text{C}$  NMR spectrum in  $\text{CDCl}_3$  of **3**
- S13. HMQC spectrum in  $\text{CDCl}_3$  of **3**
- S14. H, H-COSY spectrum in  $\text{CDCl}_3$  of **3**
- S15. HMBC ( $^nJ_{\text{HC}} = 8 \text{ Hz}$ ) spectrum in  $\text{CDCl}_3$  of **3**
- S16. NOESY spectrum in  $\text{CDCl}_3$  of **3**
- S17. The accurate mass from the ESITOFMS spectrum of **3**

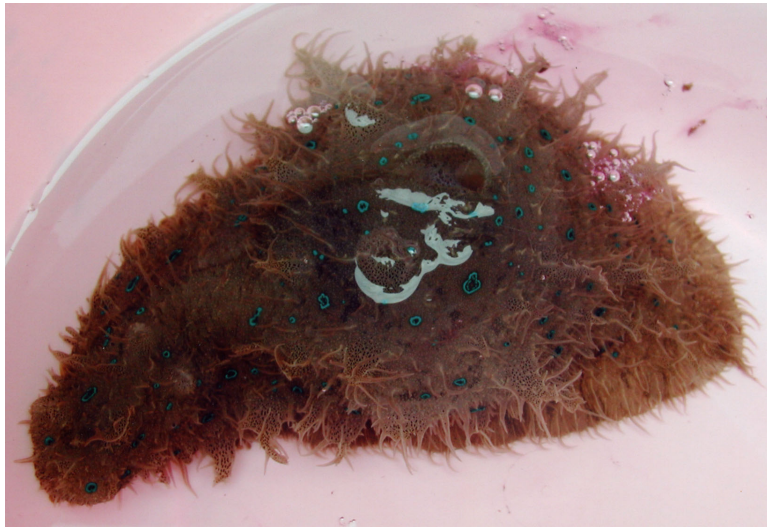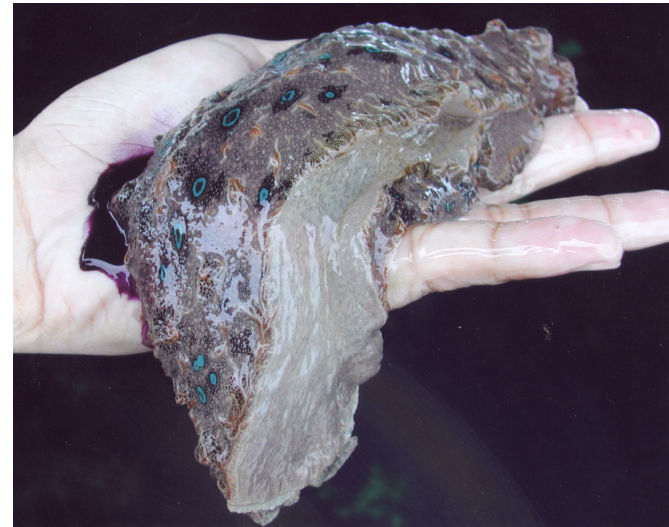

S1. The photo of the Thai sea hare, *Bursatella leachii*

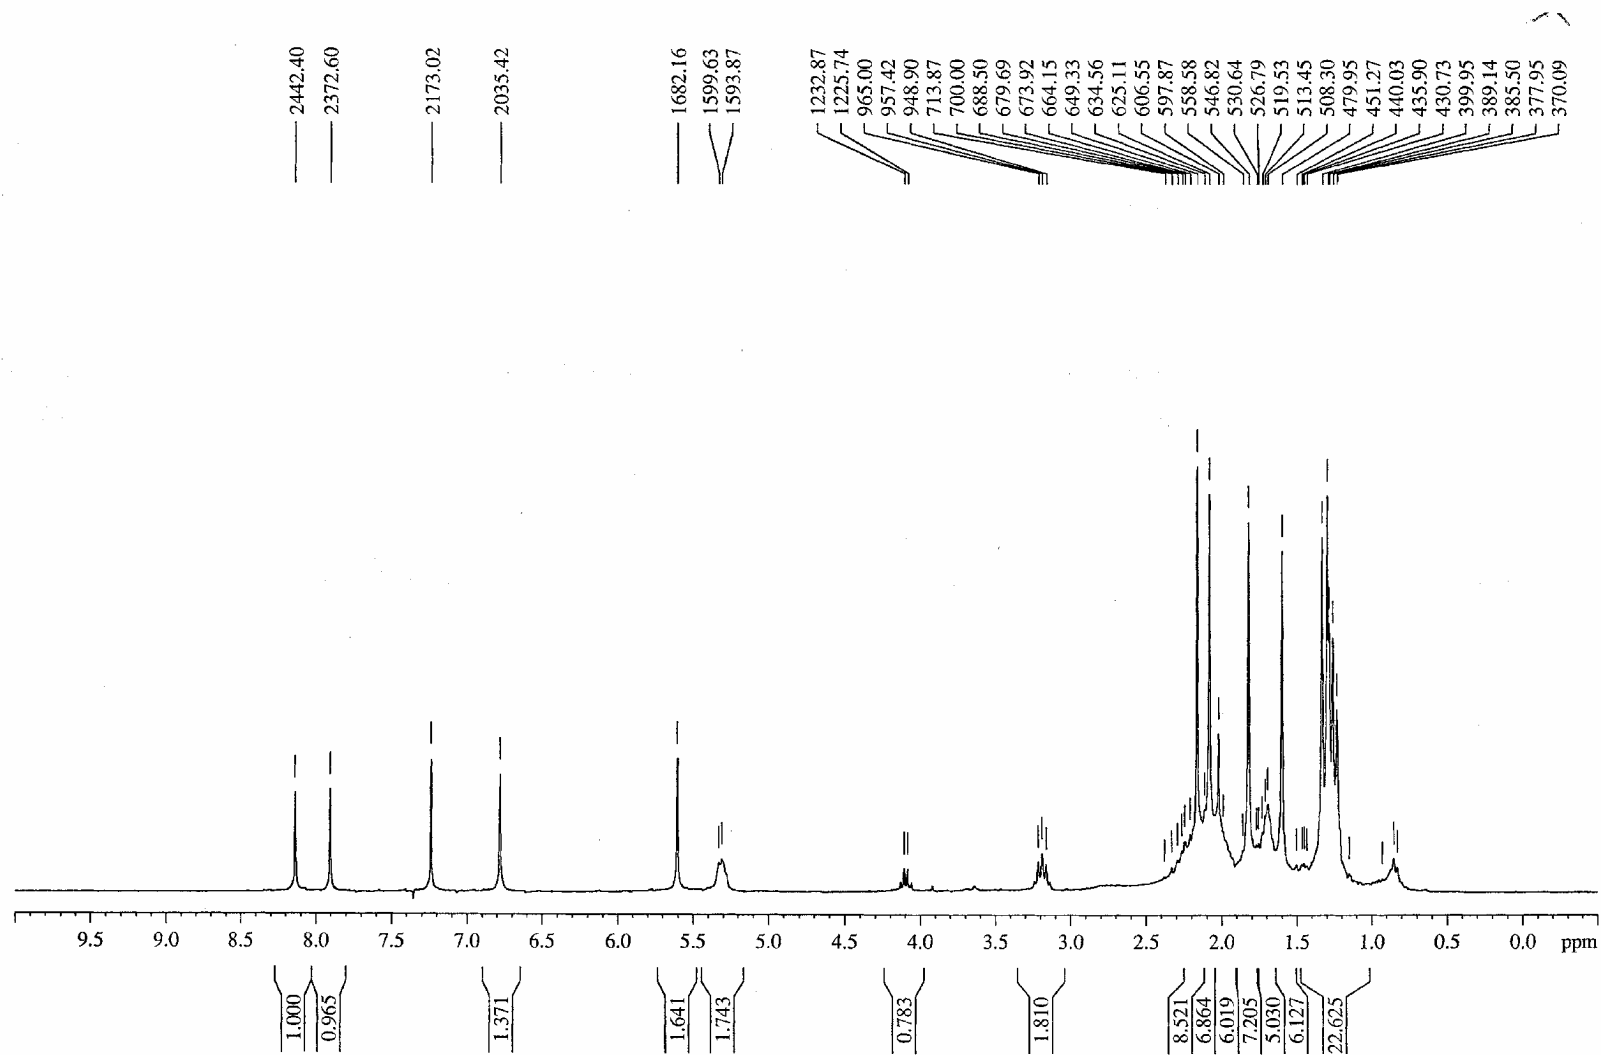

S2. 300 MHz  $^1\text{H}$  NMR spectrum in  $\text{CDCl}_3$  of hectochlorin (**1**)

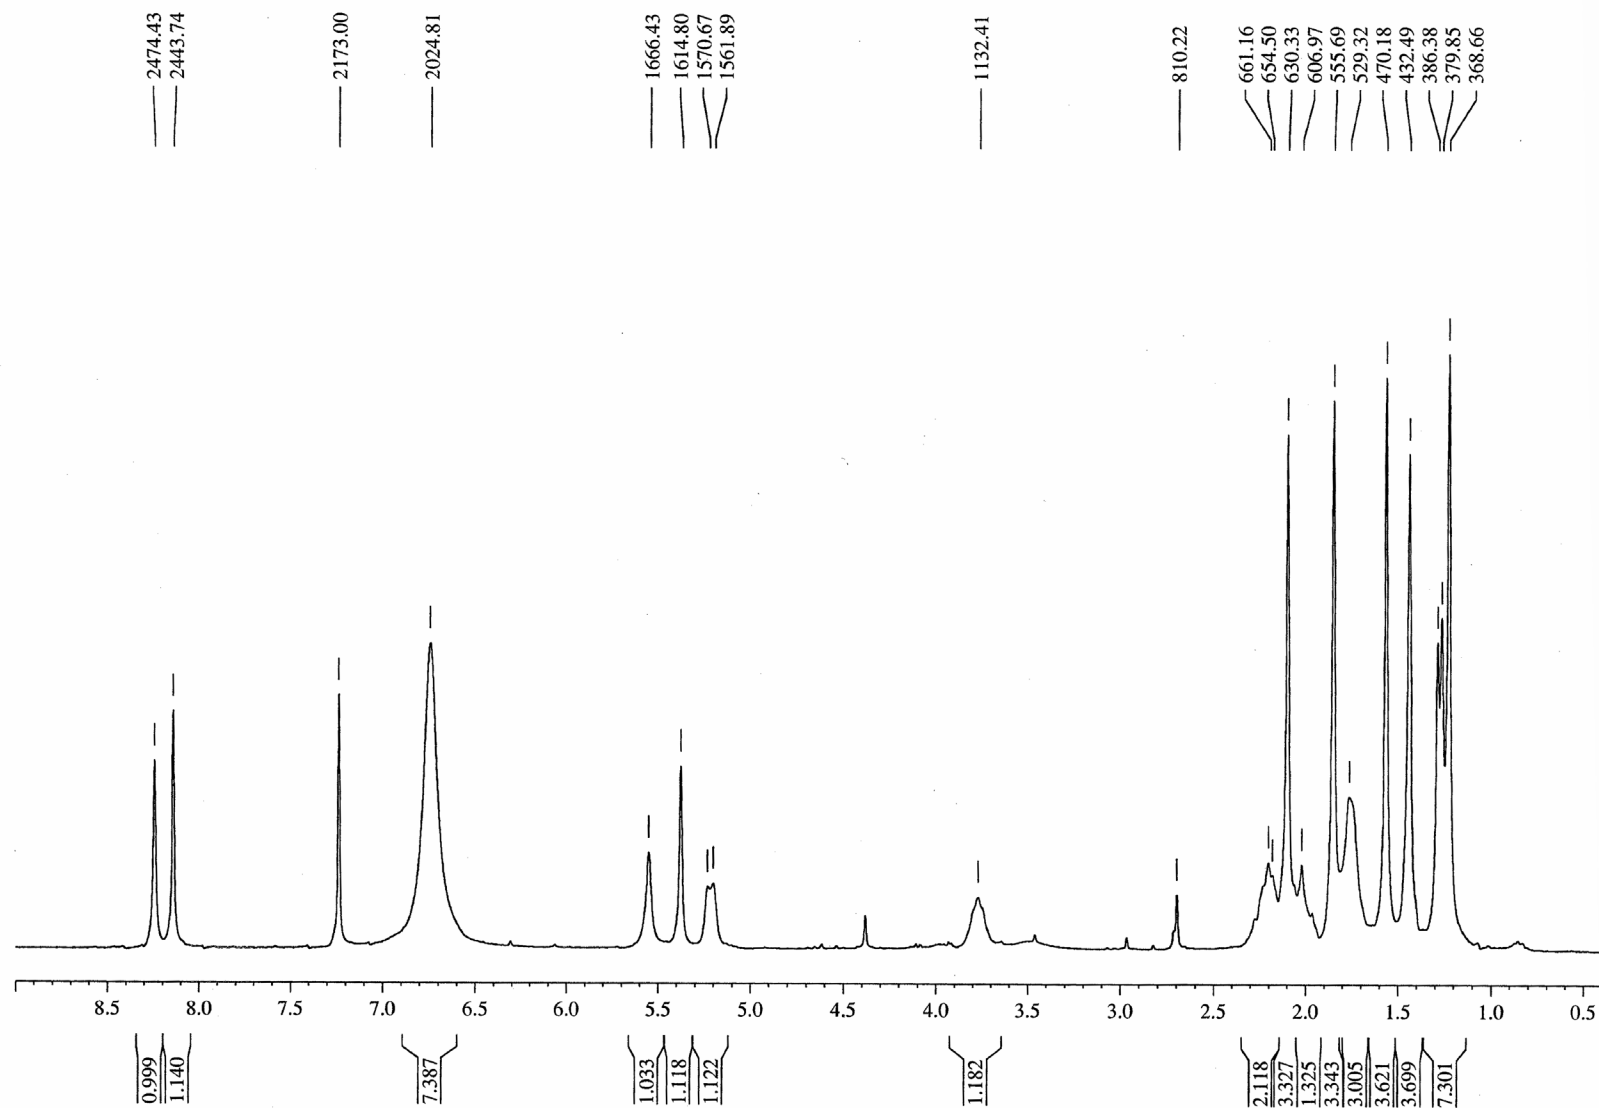

S3. 300 MHz  $^1\text{H}$  NMR spectrum in  $\text{CDCl}_3$  of deacetylhectochlorin (**2**)

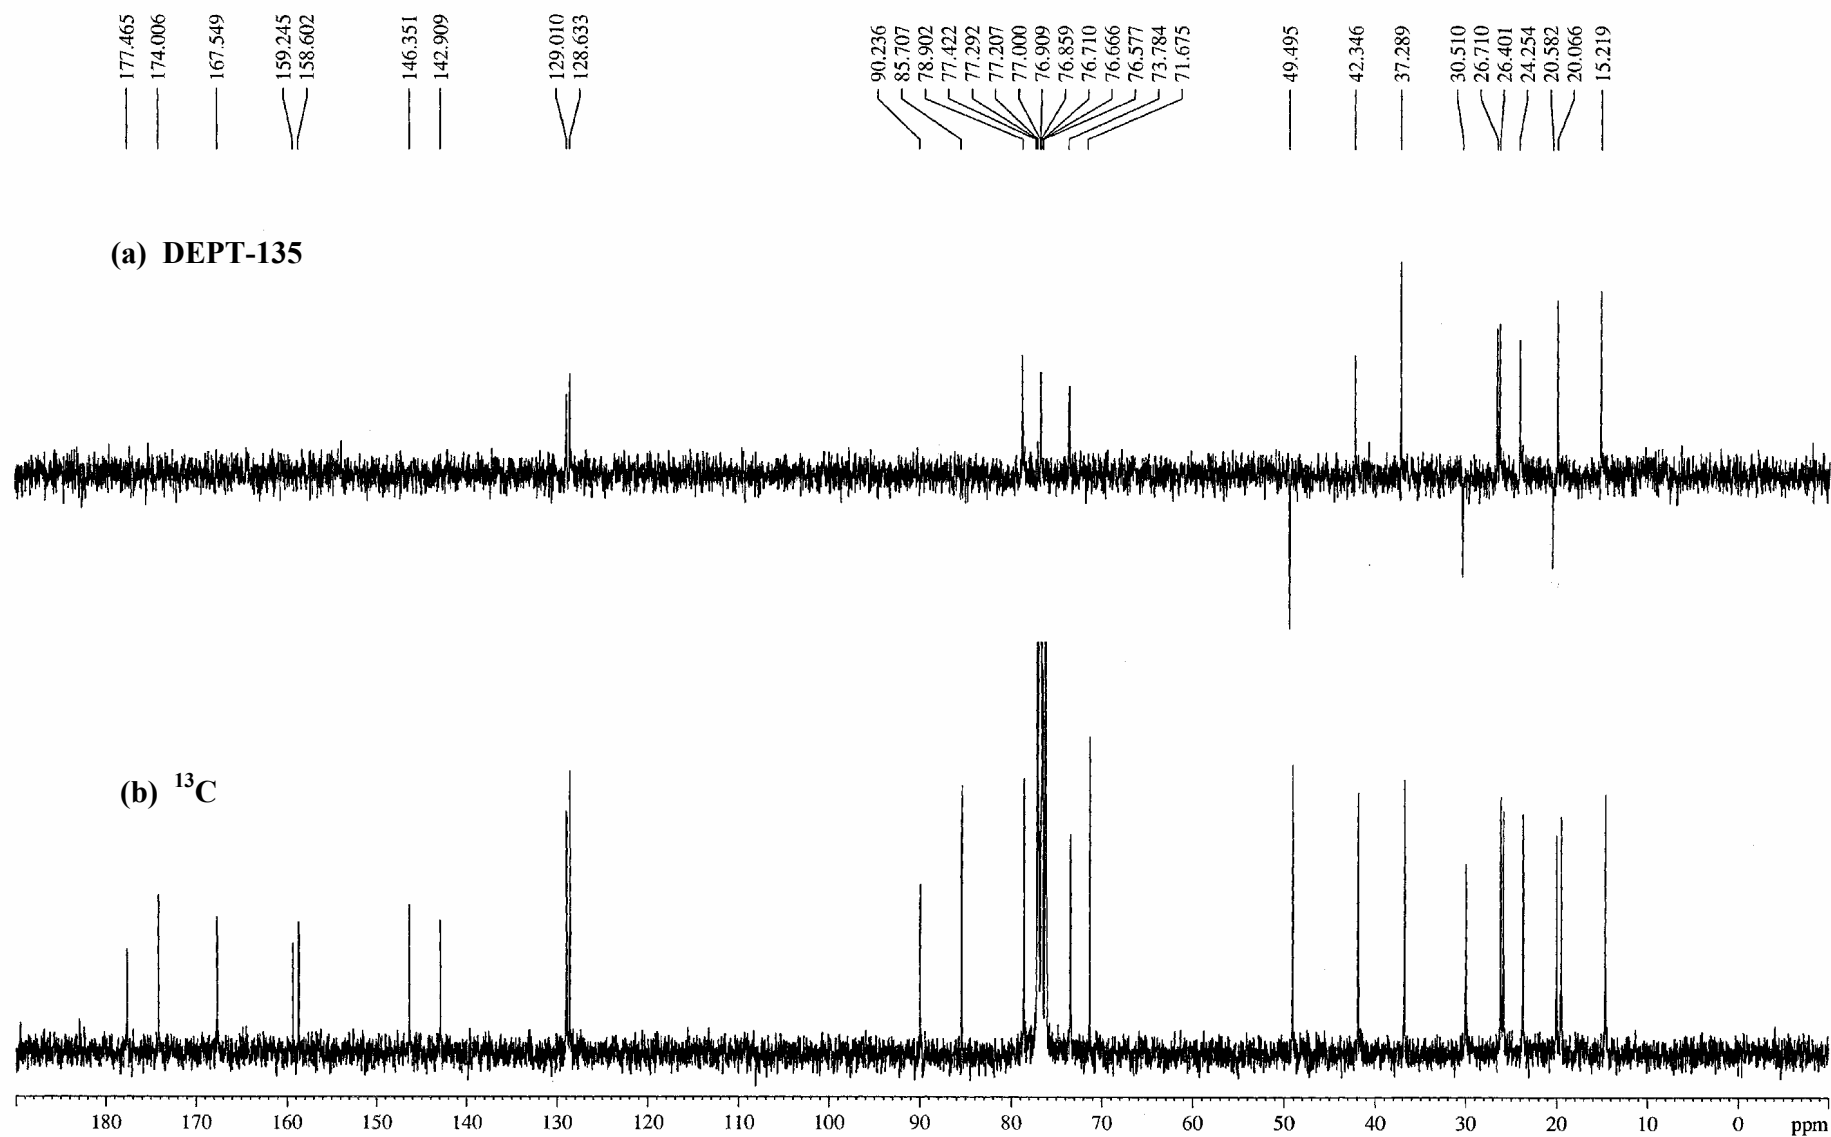

S4. 75 MHz (a) DEPT-135 and (b)  $^{13}\text{C}$  NMR spectra in  $\text{CDCl}_3$  of deacetylhectochlorin (**2**)

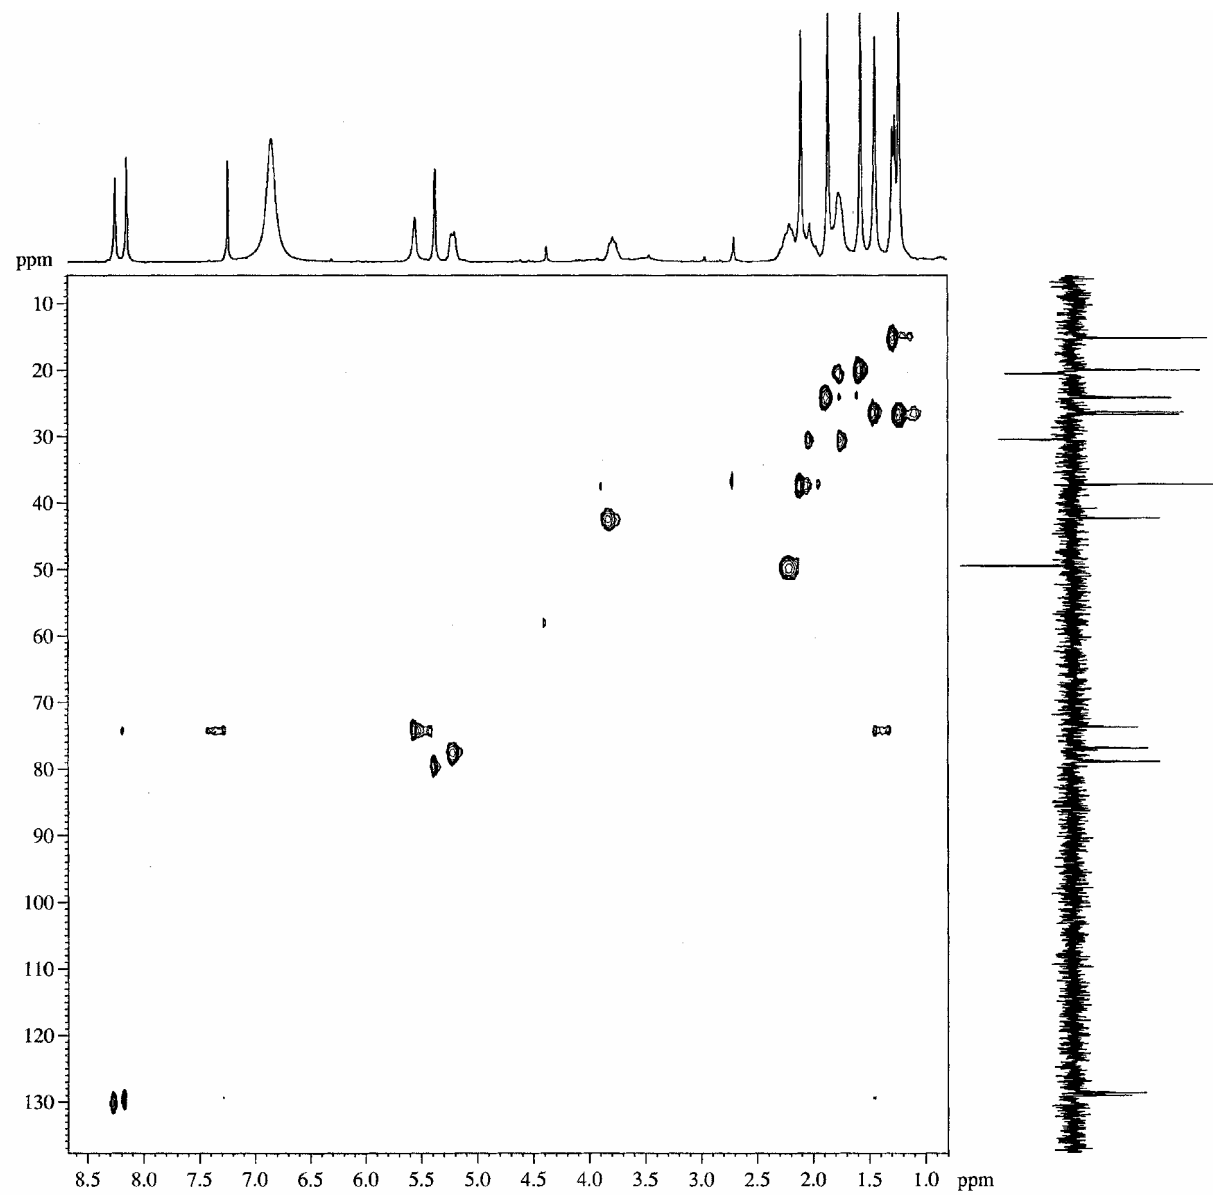

S5. HMQC spectrum in  $\text{CDCl}_3$  of deacetylhectochlorin (2)

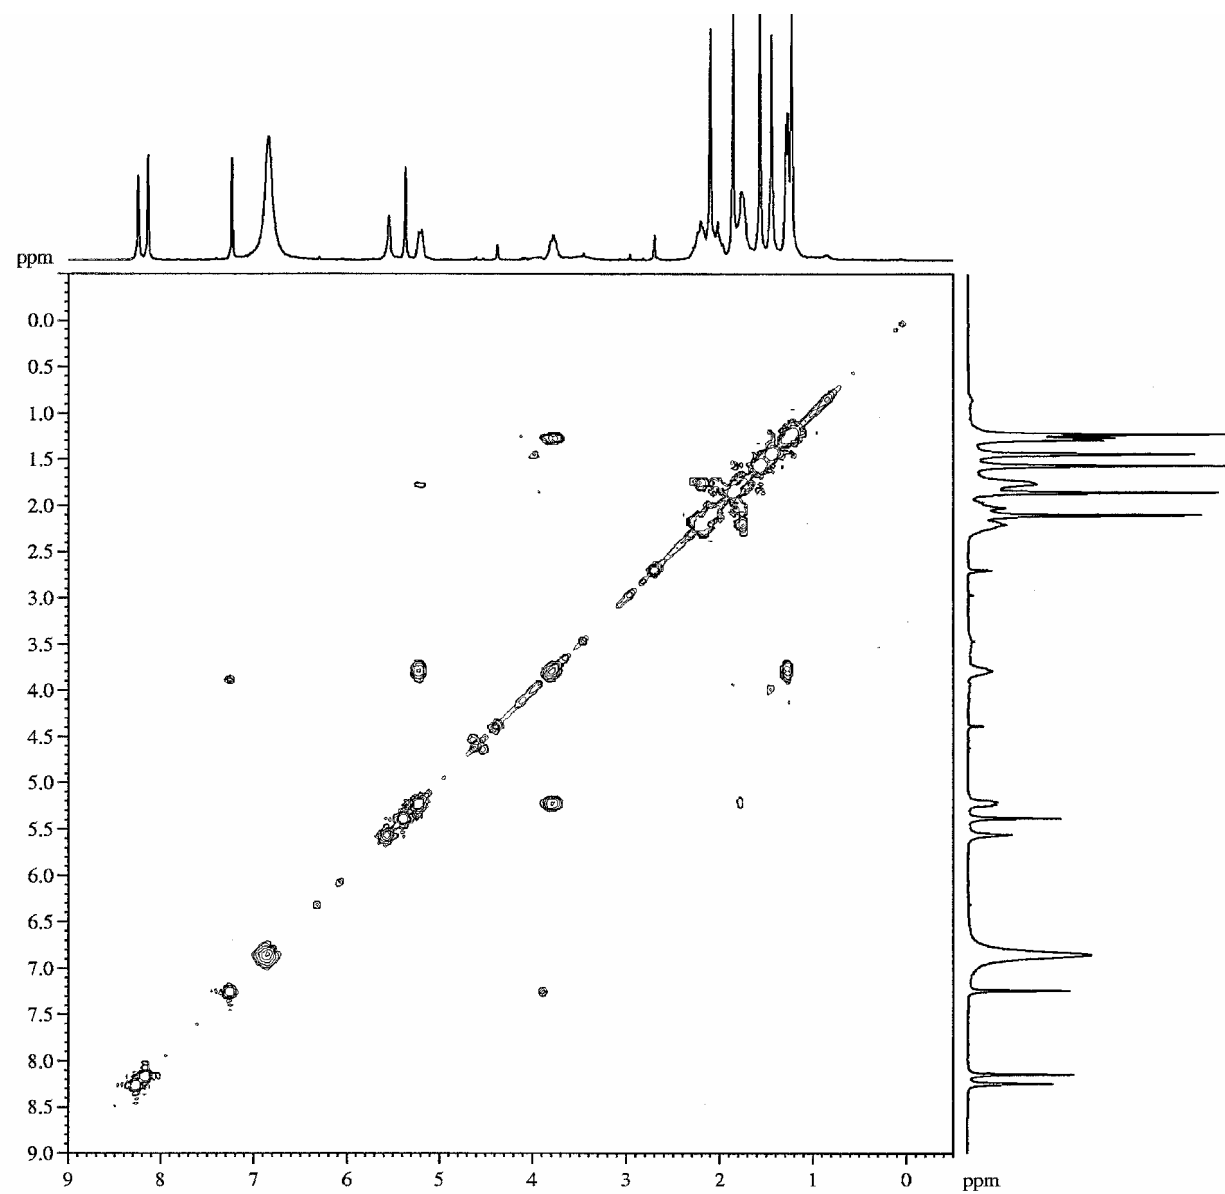

S6.  $^1\text{H}$ ,  $^1\text{H}$ -COSY spectrum in  $\text{CDCl}_3$  of deacetylhecto chlorin (**2**)

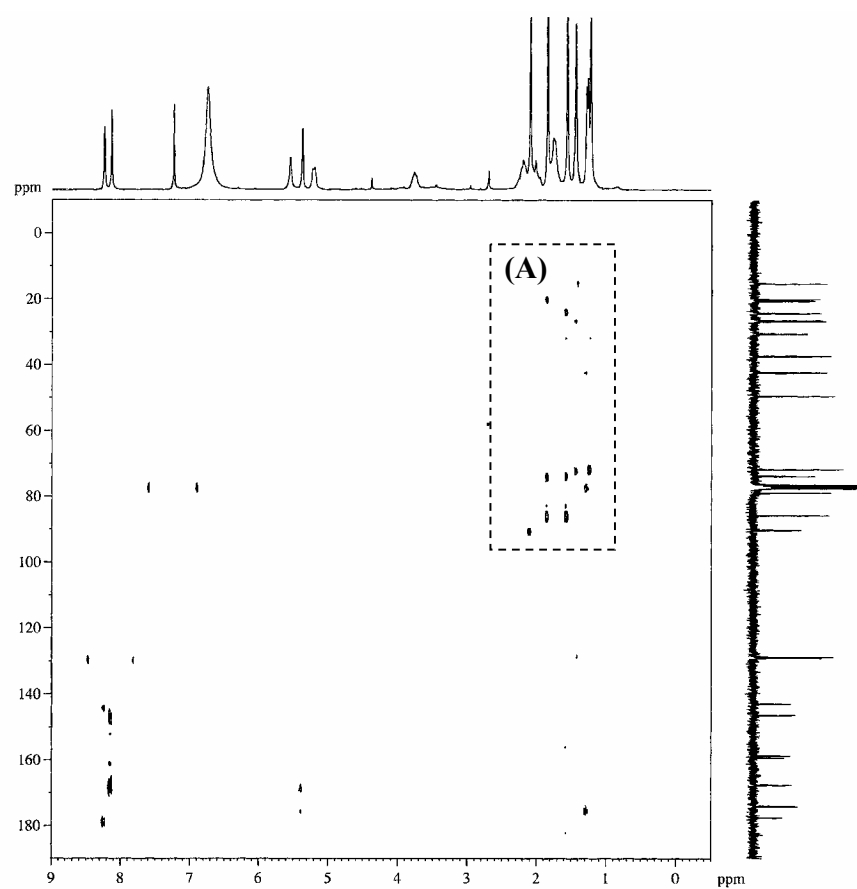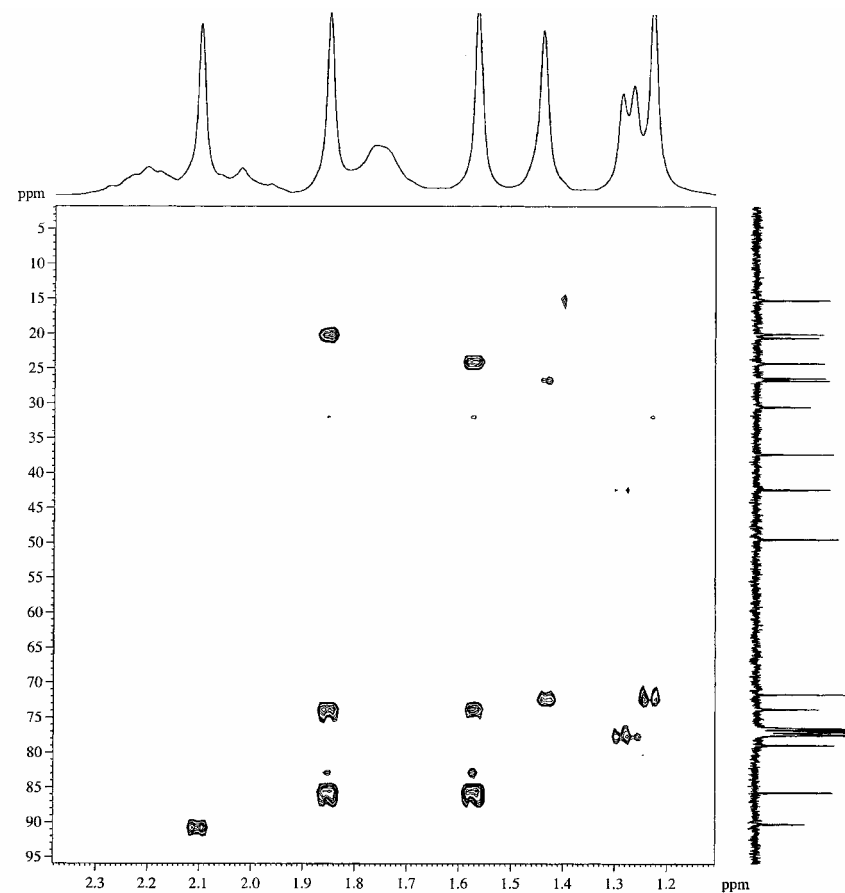

(A)

S7. HMBC spectrum in  $\text{CDCl}_3$  of deacetylhectochlorin (**2**)



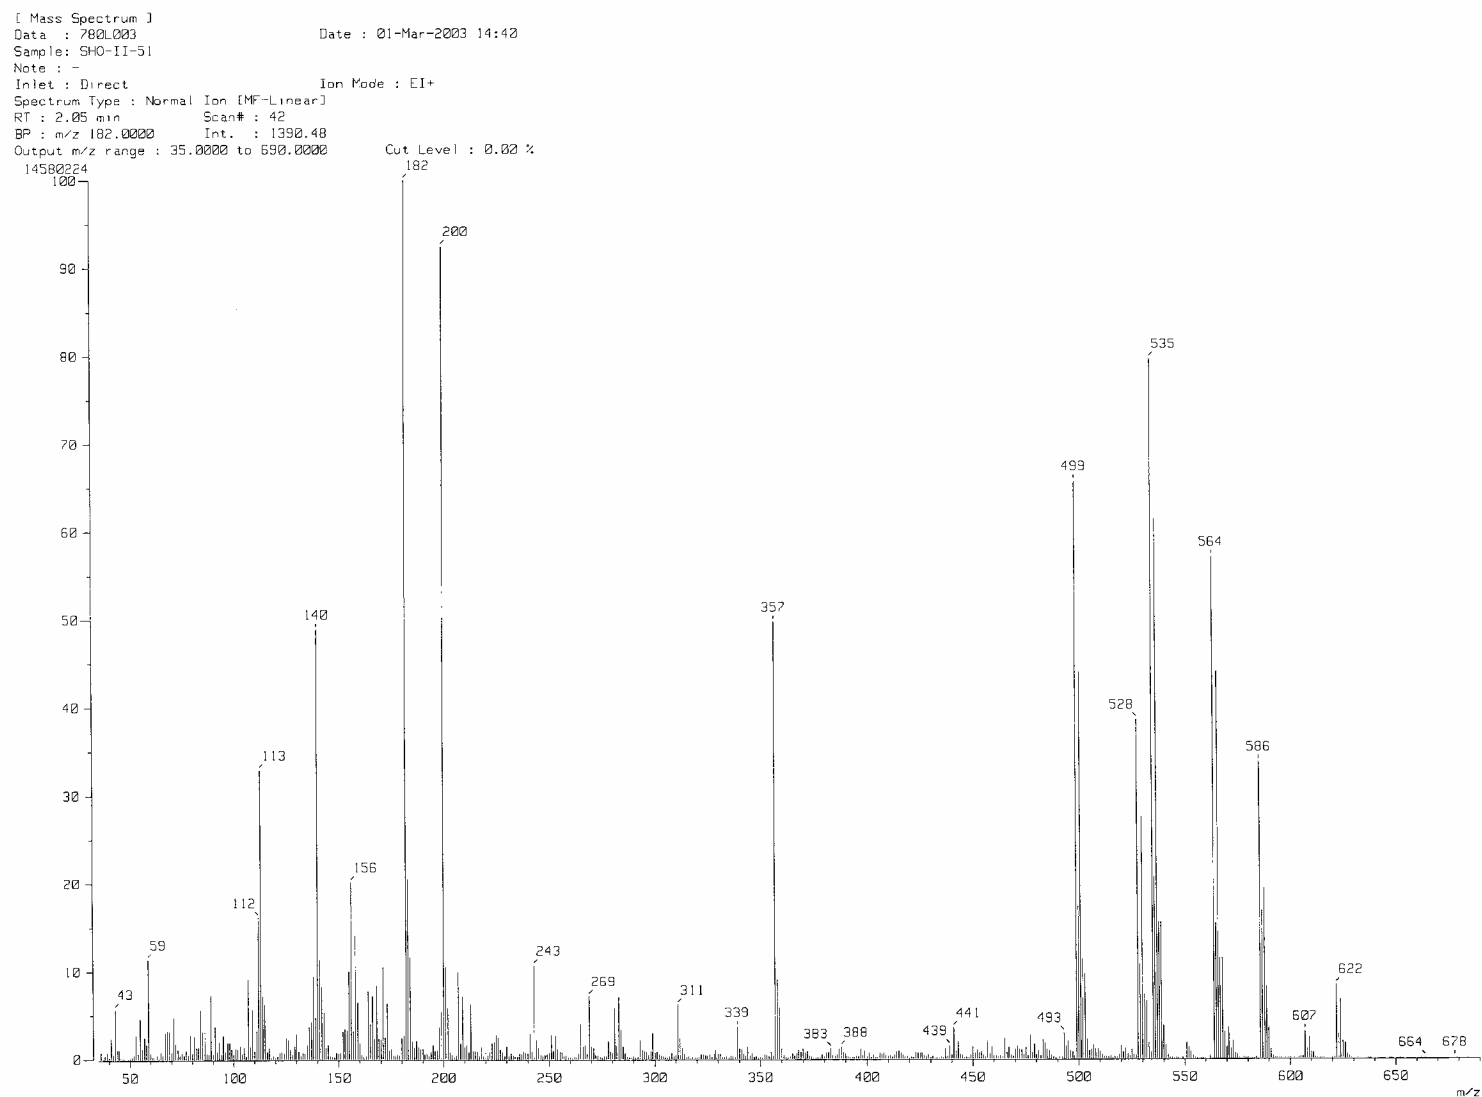

S8. The accurate mass from the HREIMS spectrum of deacetylhectochlorin (2)

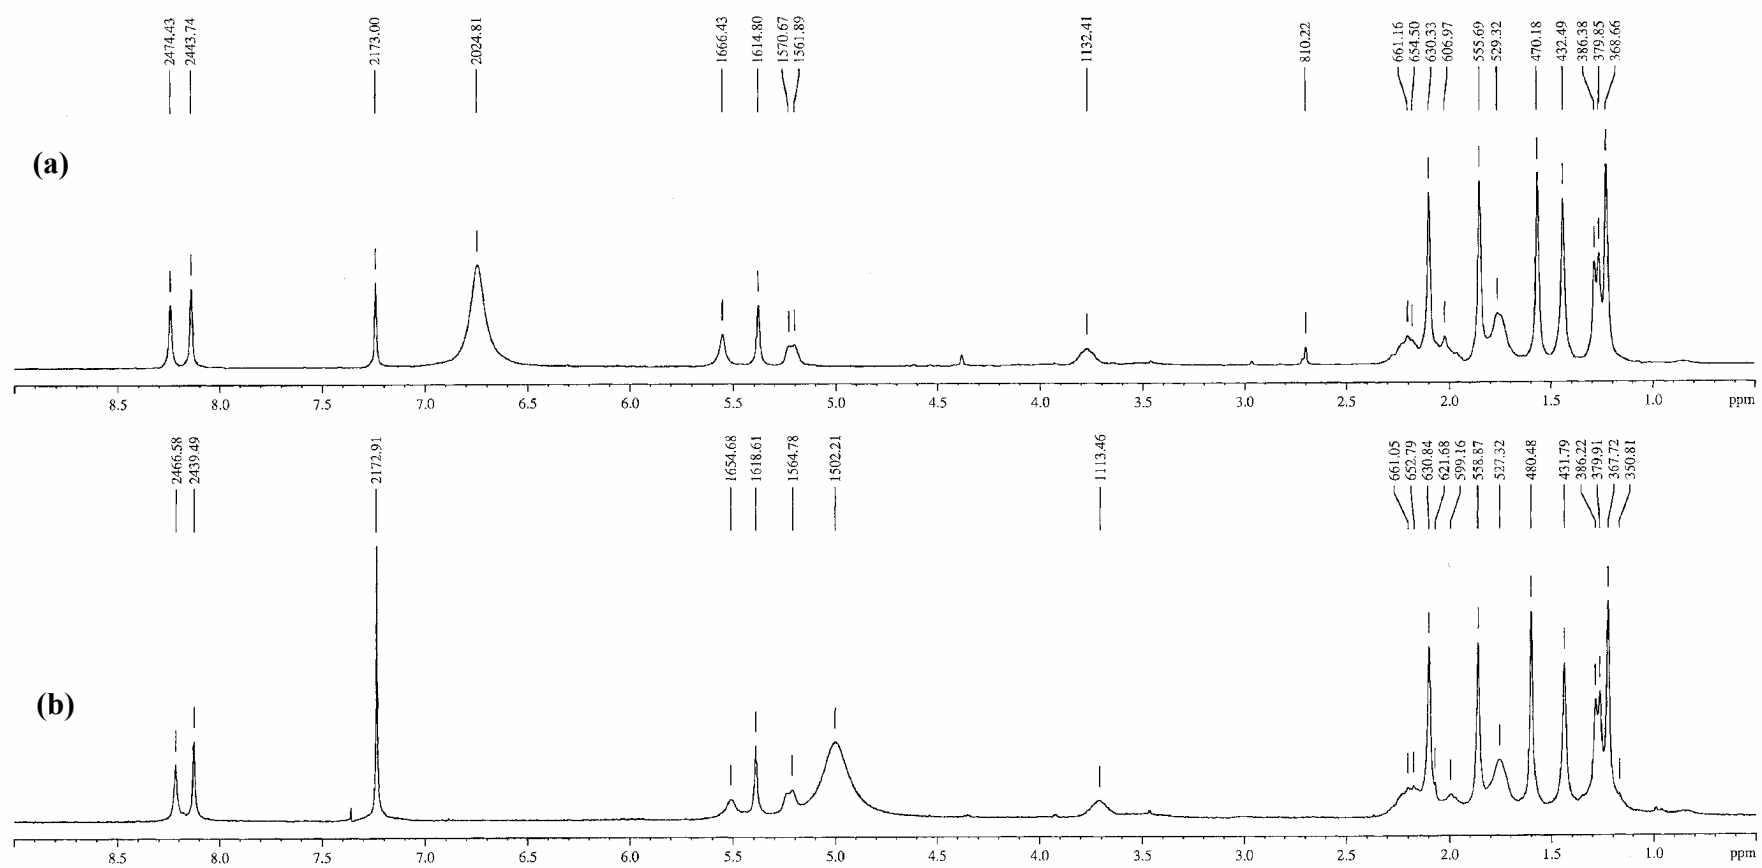

S9. 300 MHz  $^1\text{H}$  NMR spectra in  $\text{CDCl}_3$  of (a) natural and (b) transformed deacetylhectocholesterol (2)

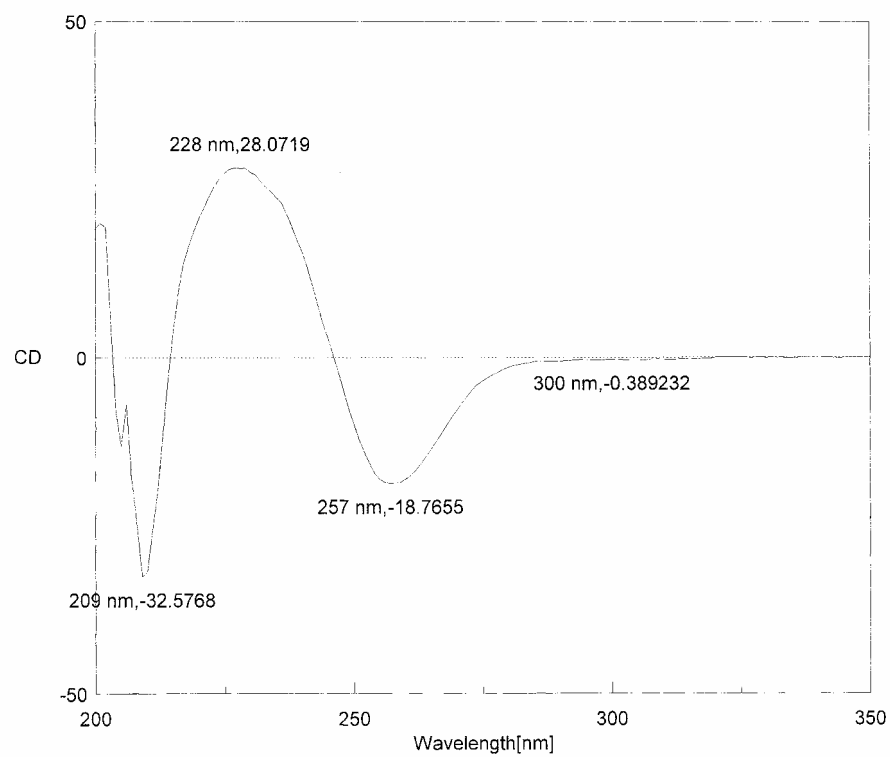

(a) natural **2**

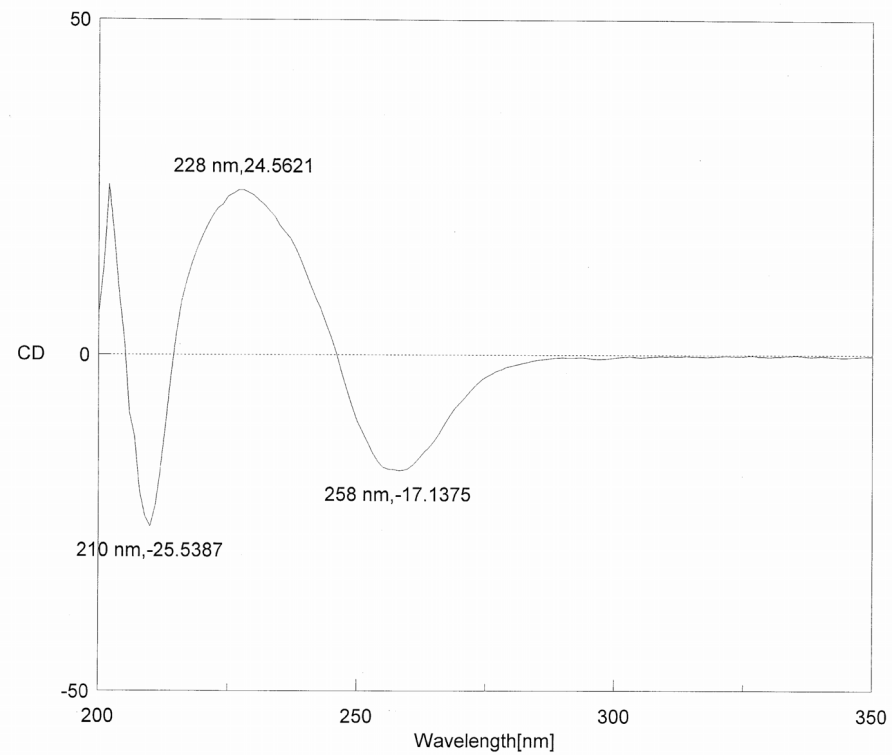

(b) transformed **2**

S10. CD spectra (in MeOH) of (a) natural and (b) transformed deacetylhectochlorin (**2**)

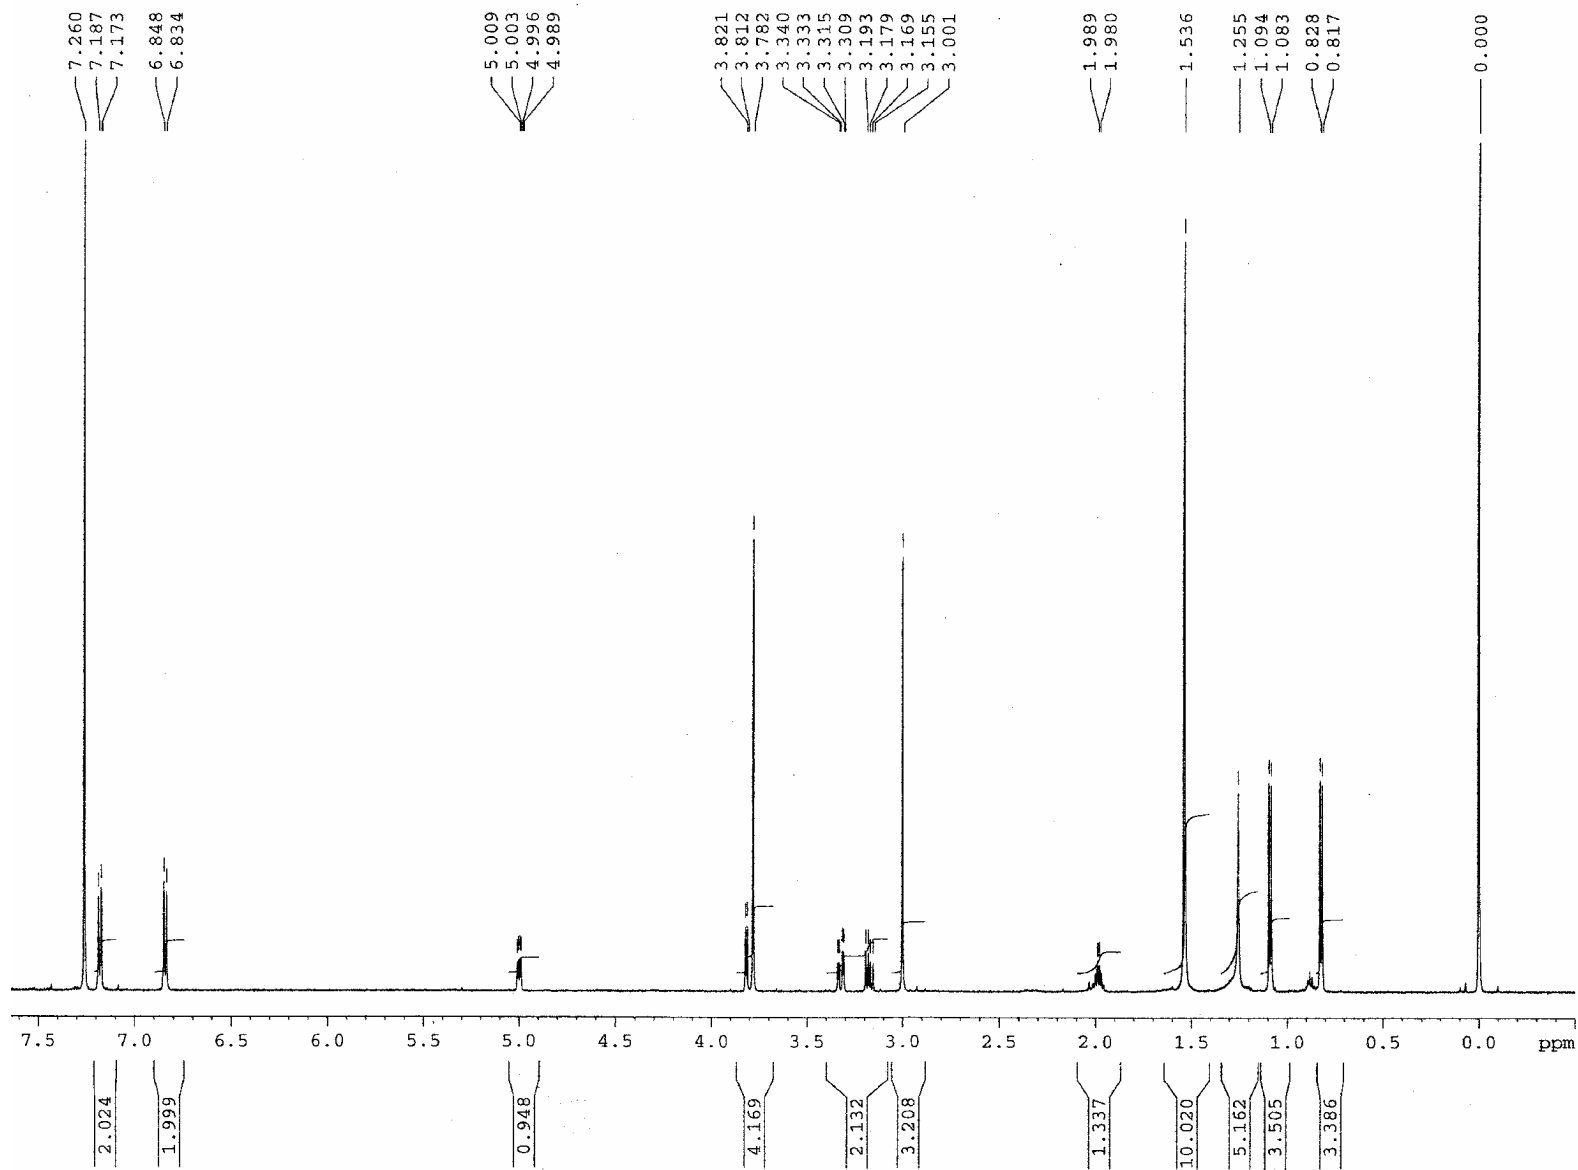

S11. 600 MHz  $^1\text{H}$  NMR spectrum in  $\text{CDCl}_3$  of **3**

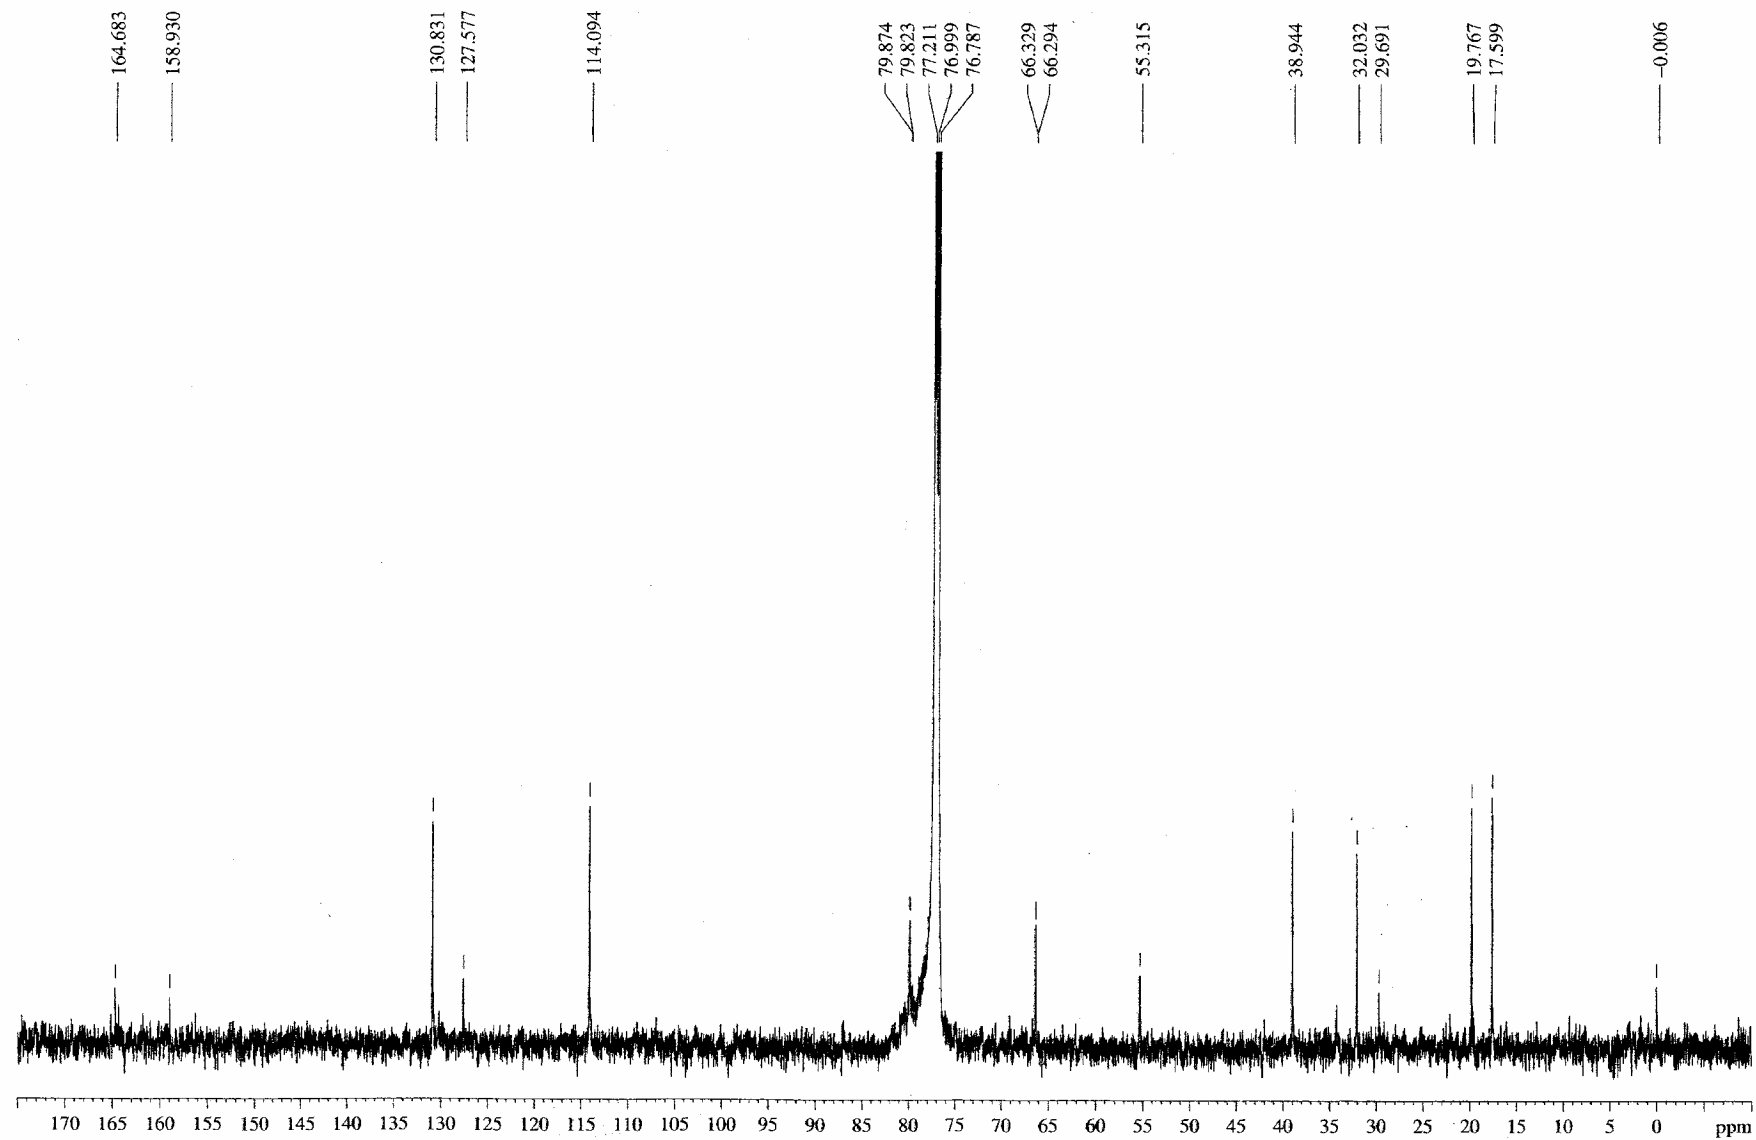

S12. 150 MHz  $^{13}\text{C}$  NMR spectrum in  $\text{CDCl}_3$  of **3**

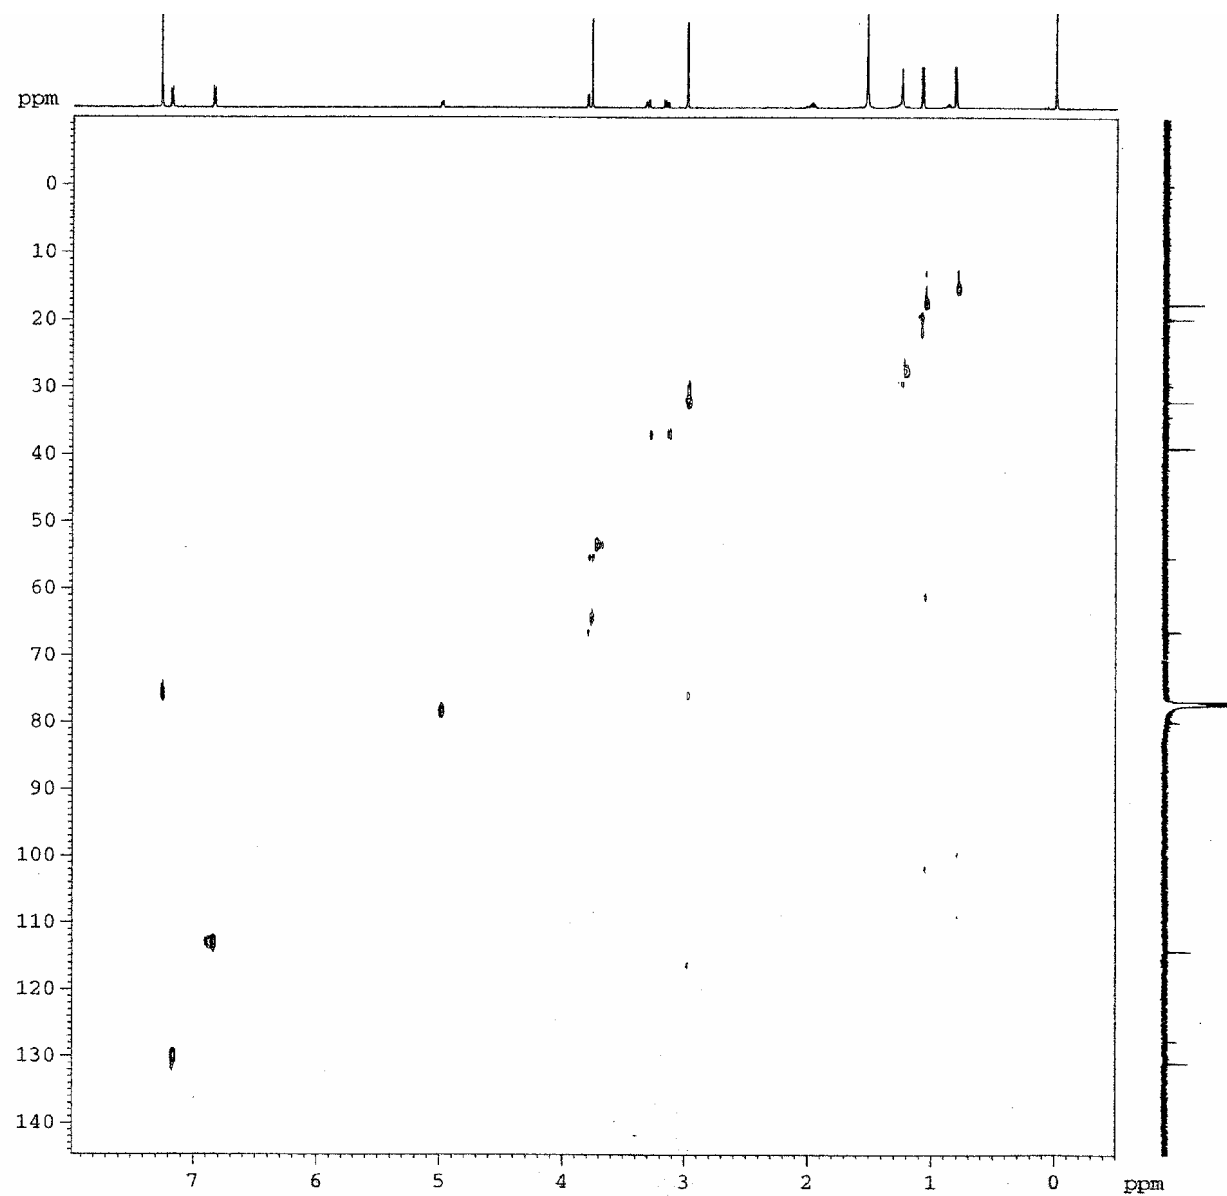

S13. HMQC spectrum in  $\text{CDCl}_3$  of **3**

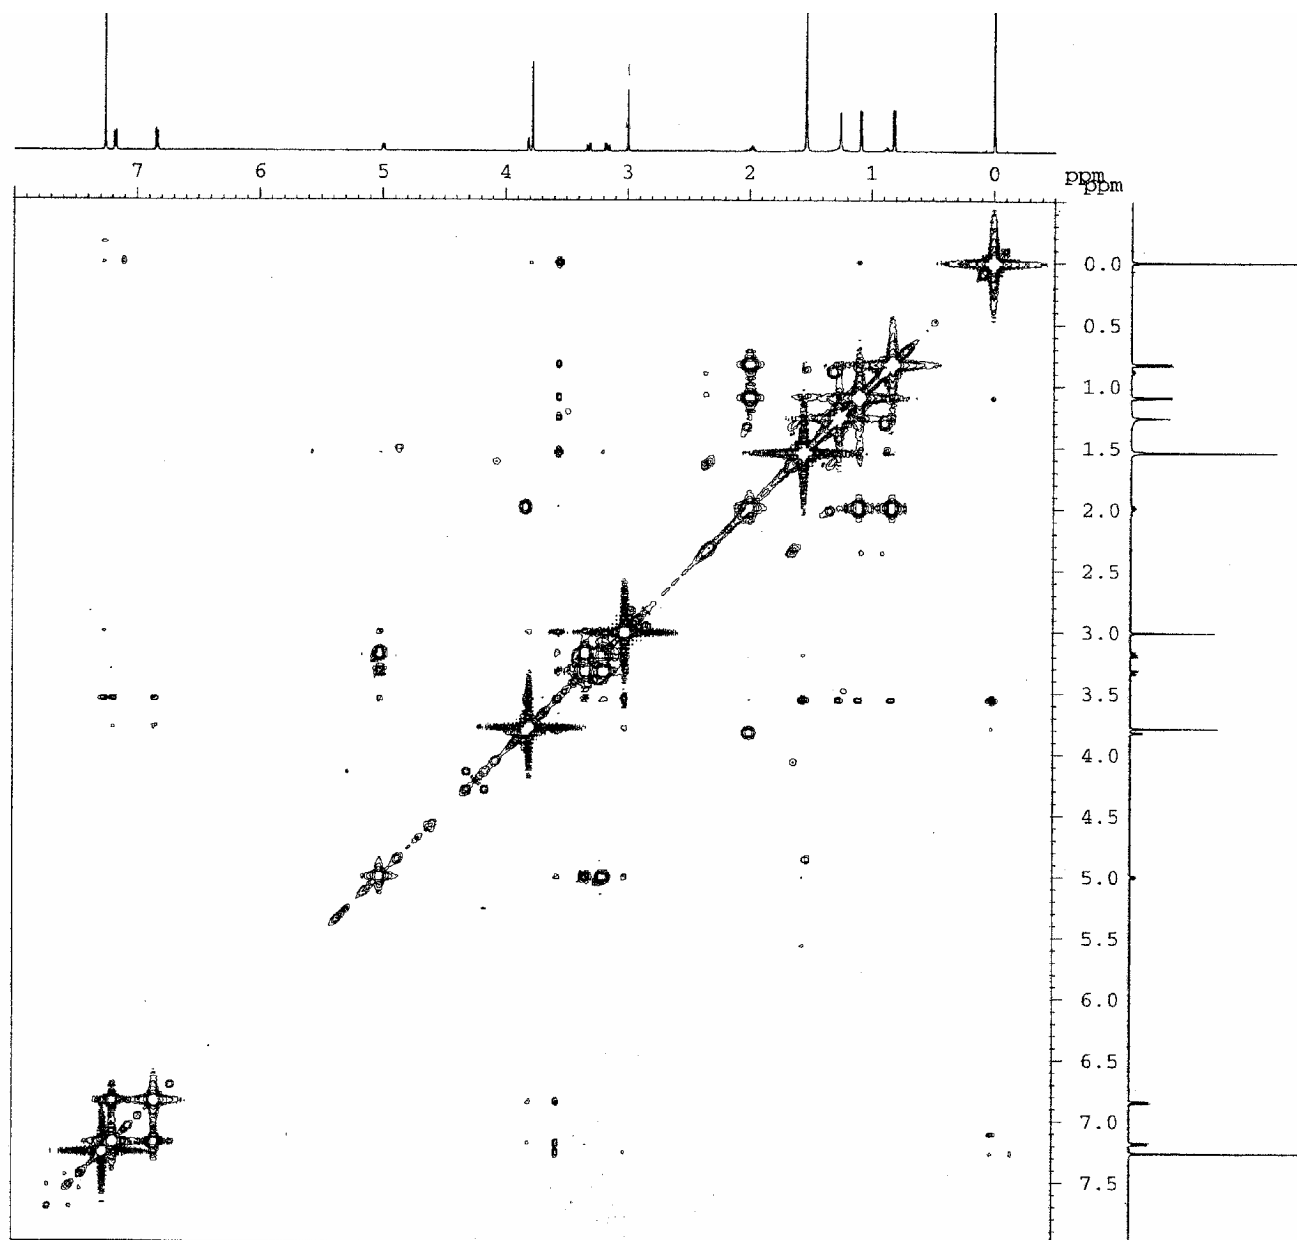

S14.  $^1\text{H}$ ,  $^1\text{H}$ -COSY spectrum in  $\text{CDCl}_3$  of **3**

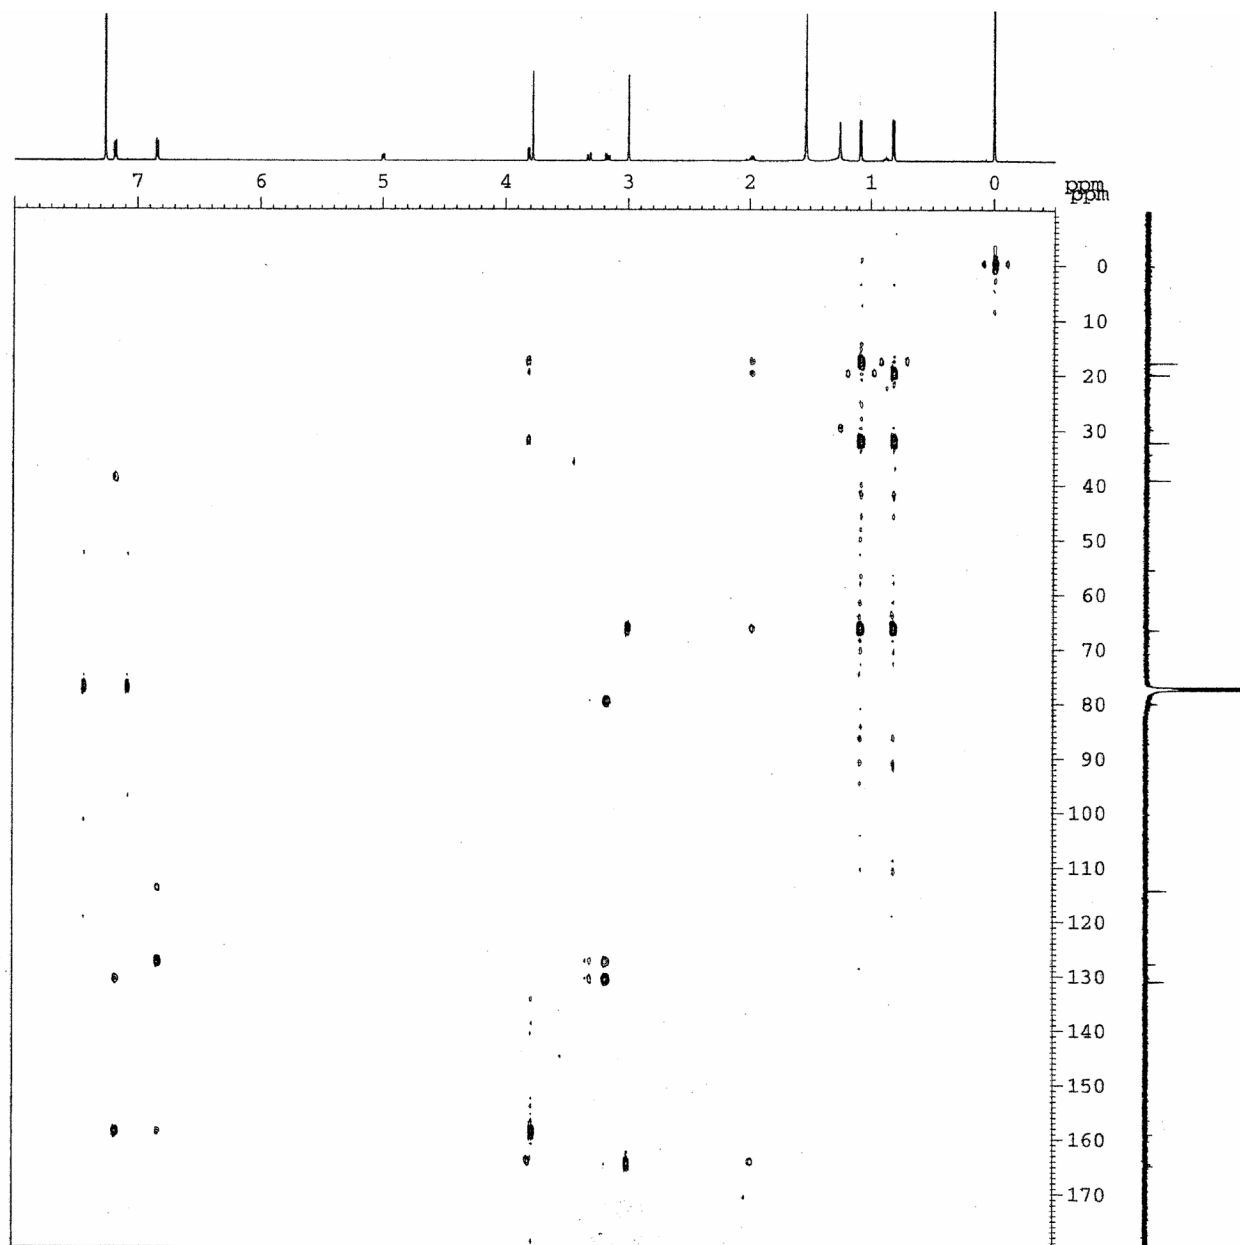

S15. HMBC ( $^nJ_{\text{HC}} = 8 \text{ Hz}$ ) spectrum in  $\text{CDCl}_3$  of **3**



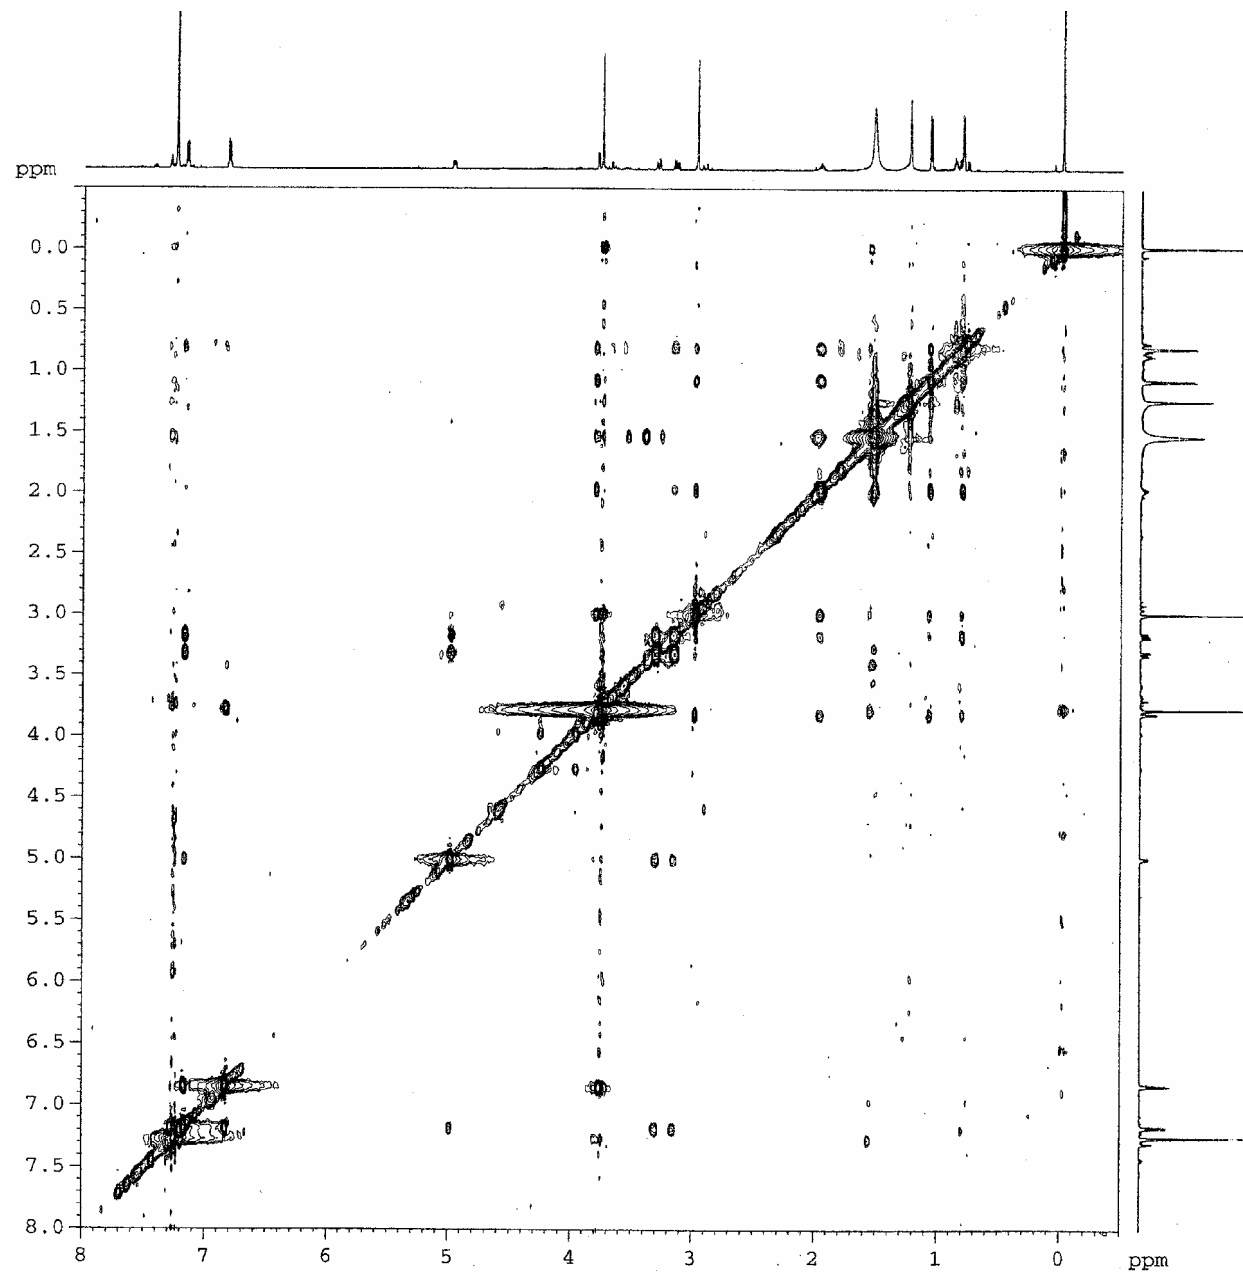

UCHADA-76 26 (0.522) Cm (13:46)

TOF MS ES+  
7.53e4

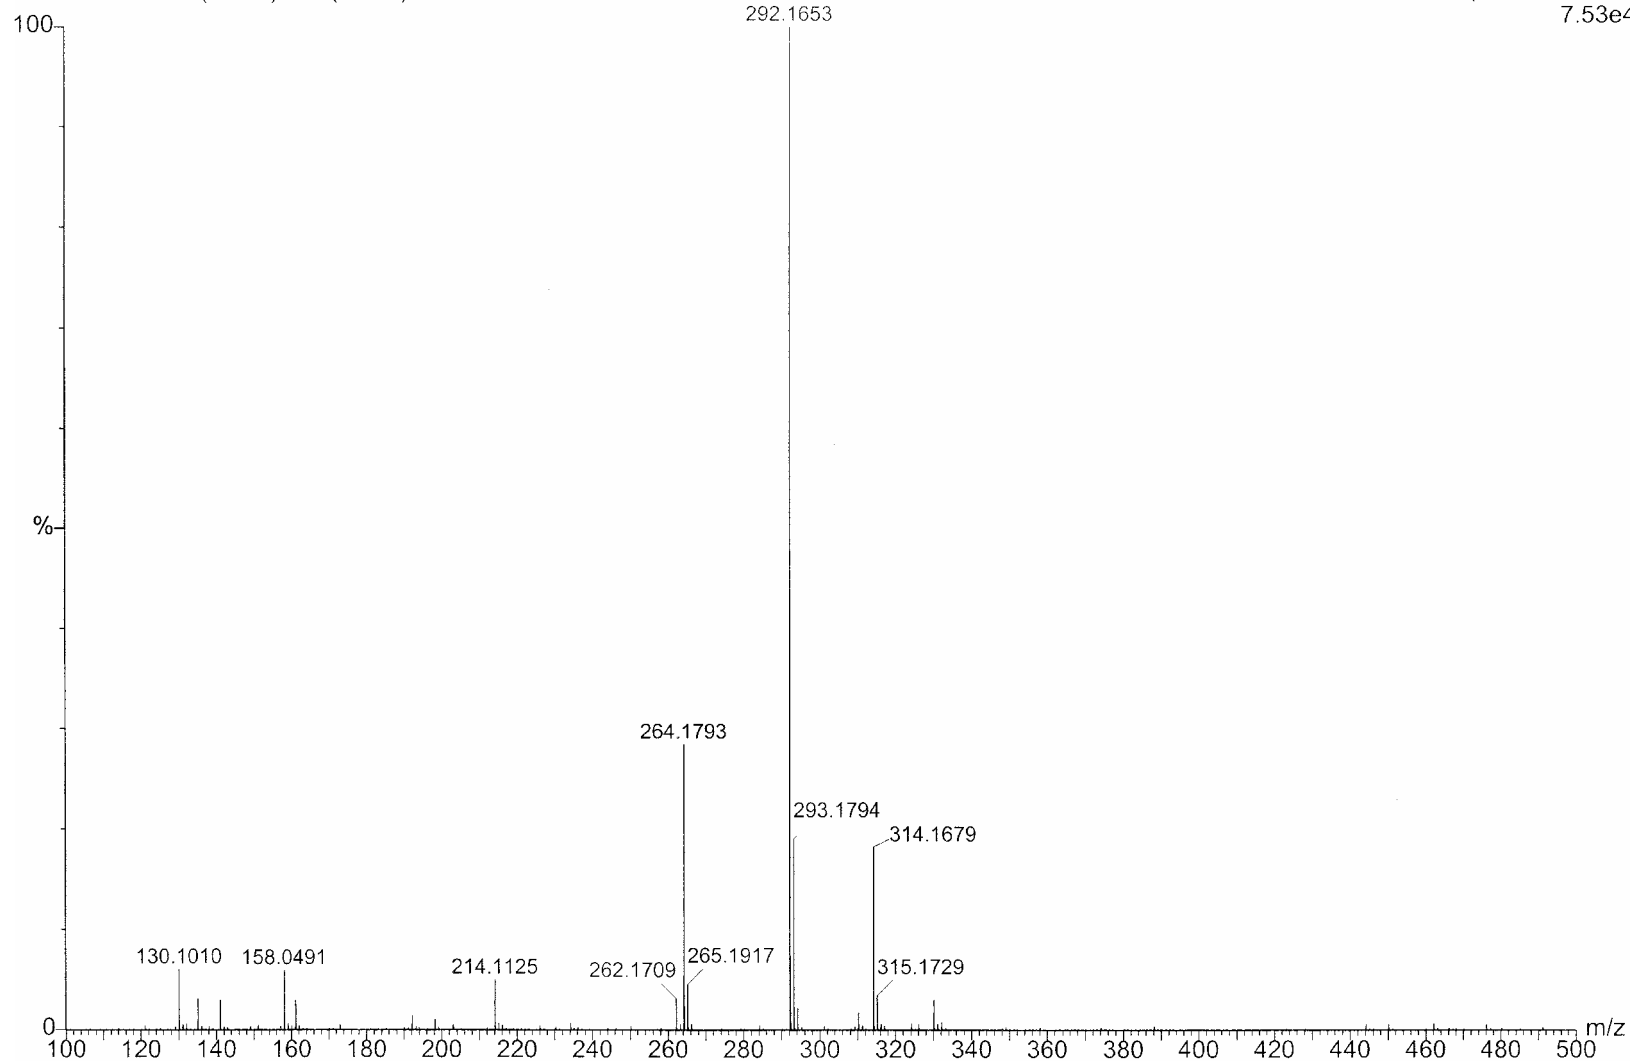

S17. The accurate mass from the ESITOFMS spectrum of **3**
